# Supplementary material for: Cre-dependent Cas9-expressing pigs enable efficient in vivo genome editing
Source: PubMed Central journal article supplement — Genome Res. 2017 Dec;27(12):2061–71. doi: 10.1101/gr.222521.117 (PMC5741047; doi:10.1101/gr.222521.117), 2017-12
Supplement: supp_gr.222521.117_Supplemental_Material-1.pdf [file supp_gr.222521.117_Supplemental_Material-1.pdf]

## **Extended Methods**

### **Isolation of porcine fetal and ear fibroblasts**

Porcine fetal fibroblasts (PFFs) were isolated from 35-day-old fetuses of the Chinese Bama mini-pigs. The head, limbs, tails and viscera of the fetuses were removed, and the remaining tissues were cut into small pieces by using sterile scissors and digested in PFF culture medium containing 0.5 mg/mL collagenase IV (Life Technologies) and 2500 IU/mL DNase I (Sigma) for 4–6 h at 37 °C. The PFF culture medium contained Dulbecco's modified Eagle's medium (DMEM, HyClone), 10% fetal bovine serum (FBS, Gibco), 1% Non-Essential Amino Acids (NEAA, Gibco), 2 mM GlutaMAX (Gibco), 1 mM sodium pyruvate (Gibco), and 2% penicillin streptomycin (HyClone). Dissociated cells were centrifuged at 250 ×g for 5 min and plated on 10 cm culture dishes. Isolated PFFs were cultured overnight and frozen in FBS containing 10% dimethyl sulfoxide for future use.

Porcine ear fibroblasts (PEFs) were isolated from the ear tissues of the newborn piglets. Ear tissues were treated with 75% ethanol for 5 min and washed three times with containing 2% penicillin streptomycin. The ear tissues were then cut into small pieces, and digested in PFF culture medium containing 0.5 mg/mL collagenase IV and 2500 IU/mL DNase for 4–6 h at 37 °C. The isolated PEFs were cultured using procedures on PFFs.

### **Generation and identification of p*Rosa26*-iCas9 targeted PFF colonies**

One day before electroporation, PFFs were thawed and grown in 10 cm culture dishes until 90% confluence was achieved. Approximately  $1 \times 10^6$  cells were then electroporated using the Neon™ transfection system (Life Technologies) at 1350 V with 1 pulse of 30 ms duration in 100 μL of Buffer B containing 15 μg of linearized [using ApaI I restriction enzyme (Thermo

Scientific)] targeting donors and 7 µg of each TALEN. The transfected cells were divided into twenty 10 cm culture dishes and recovered for 24 h. After cell recovery, 1 mg/mL G418 (Merck) was added to the PFF culture medium. After 8–12 days of selection, G418-resistant colonies were picked and cultured in 24-well plates by using cloning cylinders. Upon 70%–80% confluency, the cell colonies were sub-cultured, and 10% of each colony was lysed individually in 10 µL of NP-40 lysis buffer (0.45% NP-40 plus 0.6% Proteinase K) for 60 min at 56 °C and then for 10 min at 95 °C. The lysate was used as a template for PCR screening, which was performed using Long PCR Enzyme Mix (Thermo Scientific), in accordance with the manufacturer's instructions. PCR analysis was used to confirm HDR with the 5' junction primers (F1: 5'-TGCGTGAGTCTCTGAGCGCAG-3', R1: 5'-GGCATCAGAGCAGCCGATTGT-3'), the 3' junction primers (F2: 5'-GATGCTGTGCCGGTCGGTGTT-3', R2: 5'-GGTCAAACAGTGGCTCACATCT-3'). The PCR conditions were 95 °C for 5 min; 98 °C for 10 s, 68 °C for 30 s (–0.6 °C/cycle), 68 °C for 2 min (5-arm)/6 min (3-arm), for 35 cycles; and 72 °C for 10 min; held at 12 °C. To determine the occurrence of monoallelic or biallelic targeting, competitive PCR was performed using the primers F2 + F + R (F2: 5'-GATGCTGTGCCGGTCGGTGTT-3', F: 5'-CTCGTCATCGCCTCCATGTCAG-3', R: 5'-GTTGGGCCTATGCTCAAGATGG-3') (monoallelic targeting: 892 and 590 bp; biallelic targeting: 892 bp; wild-type: 590 bp). The PCR conditions were 95 °C for 5 min; 98 °C for 10 s, 68 °C for 30 s (–0.6 °C/cycle), 68 °C for 1 min, for 35 cycles; 72 °C for 5 min; held at 12 °C. The positive cell colonies were expanded and cryopreserved in liquid nitrogen for further SCNT.

#### **Design and construction of sgRNA vectors.**

U6-sgRNA cloning vector was purchased from Addgene (Addgene: 41819). In this vector, two BbsI restriction sites were located at the downstream region of U6 promoter. *GGTA1*-sgRNA, *APC*-sgRNA, *BRCA1*-sgRNA, *BRCA2*-sgRNA, *EML4*-sgRNA, *ALK*-sgRNA, *TP53*-sgRNA, *PTEN*-sgRNA and *KRAS*-sgRNA were designed using the G-N19-NGG rule. A pair of complementary oligonucleotides of sgRNA were synthesized and annealed at 98 °C for 5 min and then ramped down to 4 °C to generate the double-strand DNA, which was cloned into the BbsI-digested U6-sgRNA cloning vector. These constructed plasmids were further confirmed by Sanger sequence analysis. The primers used in this study are listed in Supplemental Table 3.

#### **Construction and preparation of lentiviral vector PPK and AB12**

Briefly, all PCR products of sgRNA expression cassette contained BsmB I restriction enzyme sites. Mix 150 ng of FUGW-Cre-T2A-EGFP + 150 ng of PCR products of *TP53*-sgRNA, *PTEN*-sgRNA, *KRAS*-sgRNA (or FUGW-Cre-T2A-EGFP + PCR products of *APC*-sgRNA, *BRCA1*-sgRNA, *BRCA1*-sgRNA) + 1 $\mu$ L BsmB I (NEB) + 1 $\mu$ L T4 DNA ligase (NEB) + 2 $\mu$ L T4 DNA ligase buffer in PCR tubes and the total reaction volume is 20 $\mu$ l. Run the cycle: 5  $\times$  (37°C/5min + 16°C/10min) + 55°C/5min + 80°C/5min. To avoid unwanted recombination, Stbl3 chemically competent *E. coli* were used for lentiviral plasmid PPK and AB12 construction and preparation.

#### **Cell infection and FACS.**

For infection of p*Rosa26*-iCas9 fibroblasts with purified lentiviruses, we seeded 5 $\times$ 10<sup>4</sup> fibroblasts into six-well dishes. After 24 h, p*Rosa26*-iCas9 fibroblasts were incubated for 6 h by using a diluted viral stock. Polybrene (8  $\mu$ g/mL, Sigma) was added to increase the infection

efficiency. At 7 days post-infection, fibroblasts were analyzed by fluorescence microscopy and flow cytometry. For FACS, cells were trypsinized and washed twice with PBS. Afterward, EGFP and tdTomato expression were analyzed by flow cytometry.

### **Genomic DNA extraction and indel analysis**

Genomic DNA from both cells and tissues was extracted using TIANGEN genomic DNA extraction kit following the manufacturer's recommendation. *pRosa26-iCas9* fibroblasts and tissues infected by lentivirus were used as PCR templates for both captured sequencing and T7EN1 cleavage assay by using high-fidelity polymerases (KOD-Plus-Neo, TOYOBO). Selected PCR products were ligated into pMD18-T vector (Takara) and further sequenced to determine the exact mutant sequences.

### **Western blot analysis**

Cells were lysed in RIPA buffer supplemented with protease and phosphatase inhibitors (Roche) on ice for 15 min. The protein lysates were mixed with SDS loading buffer (62.6 mM Tris-HCl, 10% glycerol, 0.01% bromophenol blue, 2% SDS, pH 6.8) after determining the protein concentration following the Lowry method (Bio-Rad). The samples were boiled for 15 min, loaded onto SDS-PAGE gels for separation, and then transferred to nitrocellulose membrane. The membranes were blocked with 5% skim milk in TBST for 2 h. PVDF was then incubated with the primary antibody for 2 h (rabbit anti-CRISPR-Cas9 antibody, Hangzhou HuaAn Biotechnology Company; mouse anti- $\alpha$ -Gal Epitope antibody, M86, Enzo). After rinsing three times with TBST, the membrane was incubated for 1 h at room temperature with HRP-conjugated secondary antibodies and then rewash with TBST three times. The signal was visualized using ECL plus (Amersham) in accordance with the manufacturer's instructions.

### **T7EN1 cleavage assay**

Lentivirus infected cells were harvested and genomic DNA was extracted using TIANGEN genomic DNA extraction kit. The T7EN1 cleavage assay was performed as previously reported. Briefly, PCR products around the target sites were amplified using the primer pairs listed in Supplemental Table 3 and purified using TIANGEN PCR cleanup kit following the manufacturer's recommendations. Purified PCR products were denatured and annealed to form heteroduplex DNA in NEBuffer2 (New England Biolabs) by using a thermocycler with the following protocol: 95 °C, 5 min; 95 °C to 75 °C at -2 °C/s; 75 °C to 16 °C at -0.1 °C/s; and then held at 4 °C. Hybridized PCR products were treated with 5 U of T7 Endonuclease I at 37 °C for 15 min. Products were separated using 2% agarose gel and then detected by ethidium bromide staining. The was calculated using the following formula: Cleavage efficiency (%) =  $100 \times [1-(1-\text{fraction cleaved})^{1/2}]$

### **RT-PCR**

RT-PCR was conducted to investigate the expression profiles of porcine *EML4* and *ALK*. Total RNAs were extracted from *EML4*-sgRNA or/and *ALK*-sgRNA lentiviruses infected p*Rosa26*-fibroblasts by using TRIzol Reagent (LifeTechnologies). Genomic DNA was digested with DNaseI. cDNAs were then prepared using PrimeScript™ II Reverse Transcriptase kit (Takara). The primers used to amplify the porcine *EML4-ALK* fusion transcripts were *EML4*-F: 5'-TGGGGAATGGAGATGTGCTT-3' and *ALK*-R: 5'-TGAGGGTGATGTTTTTCCGAG-5'. The porcine glyceraldehyde-3-phosphate dehydrogenase (*GAPDH*) was used as the control gene (GAPDH-F: 5'-GATGGCCCCTCTGGGAAACTGTG-3'; GAPDH-R: 5'-GGACGCCTGCTTCACCACCTTCT-3'). The RT-PCR products were predicted to be 279 bp

(*EML4-ALK* fusion transcripts) and 234 bp (*GAPDH*) and then sequenced by BGI.

### Targeting Vector Sequences

Elements:

p*Rosa26* left arm

SA

*loxP*

Neomycin

SV40 polyA

*loxP2272*

inverted polyA

inverted tdTomato

inverted T2A

inverted SpCas9

p*Rosa26* right arm

PGK promoter

**DTA**

PGK-polyA

GAGGCTGTGCTCTGGGGCTCCGGCTCCTCAGAGAGCCTCGGCTAGGTAGGGGAGC

GGGACTCTGGTTTGGGGGAGGGCCGGCGGTTTGGCGGGGGATGGGTGCTTGAGG

TGGTCTGACCGGTAGCGGGGGTTCGCCTTCCCTAGCGGGAAGTCGGGAGCATATCG

TTTGTTACGCTGGAAGGGGAAGAGGTGGTGAGAGGCAGGCGGGAGTGCGGCCCG

CCCTGCGGCAACCGGAGGGGGAGGGAGAAGGGAGCGGAAAAGCCTGGAATACG

GACGGAGCCATTGCTCCCGCAGAGGGAGGAGCGCTTCCTGCTCTTCTTTGTCAC

TGATTGGCCGCTTCTCCTCCCGCCGTGTGTGAAAACACAAATGGCGTGTTTTGGTT

GGAGTAAAGCTCCTGTCAGTTACAGCCTCGGGAGTGCGCAGCCTCCCAGGAACTC

TCGCATTGCCCCCTGGGTGGGTAGGTAGGTGGGGTGGAGAGAGCTGCACAAGAG

GGCGCTGTCGGCCTCCTGCGGGGGGAGGGGAGGGTCAGTGAAAGTGGCTCCCGC

GCGGGCGTCCTGCCACCCTCCCCTCCGGGGGAGTCGGTTTACCCGCCGCTGCTC

GGCTTTGGTATCTGATTGGCTGCTGAAGTCCTGGGAACGGCCCCTTGTATTGGCT

TGGGTCCCAAATGAGCGAAACCACTACGCGAGTCGGCAGGGAGGCGGTCTTTGGT

ACGGCCCTCCCCGAGGCCAGCGCCGAGTGTCTGGCCCTCGCCCTGCGCAACG

TGGCAGGAAGCGCGCGCAGGAGGCGGGGGCGGGCTGCCGGGCCGAGGCTTCTGG

GTGGTGGTGACTGCGGCTCCGCCCTGGGCGTCCGCCGCTGAAGGACGAGACTAG

CTCTACCTGCTCTCGGACCCGTGGGGGTGGGGGGTGGAGGAAGTGAGTGGGGGG

TCGGTCCTGCTGGCTTGTGGGTGGGAGGCGCATGTTCTCCAAAACCCGCGCGAG

CTGCAATCCTGAGGGAGCTGCAGTGGAGGAGGCGGAGAGAAGGCGCACCCCTTCT

CCGCAGGGGGAGGGGAGTGCCGCAATACCTTTATGGGAGTTCTCTGCTGCCTCCTT

TTCCTAAGGACCGCCCTGGGCCTAGAAAAATCCCTCCCTCCCCGCGATCTCGTCA

TCGCCTCCATGTCAGTTTGCTCCTTCTCGATTATGGGCGGGATTCTTTTGCCTGGC

TTAACCTGATTCTTGGGCGTTGTCCTGCAGGGTGACCTGCACGTCTAGGGCGCAGT

AGTCCAGGGTTTCCTTGATGATGTCATACTTATCCTGTCCCTTTTTTTTCCACAGCTC

GCGGTTGAGGACAAACTCTTCGCGGTCTTTCCAGTAAGAATTCCTCGATCGAGGG

ACCTAATAACTTCGTATAGCATAATTATACGAAGTTATTAAGGGTTCCGCAAGCT

TGCAGCCAATATGGGATCGGCCATTGAACAAGATGGATTGCACGCAGGTTCTCCGG  
CCGCTTGGGTGGAGAGGCTATTCGGCTATGACTGGGCACAACAGACAATCGGCTG  
CTCTGATGCCGCCGTGTTCCGGCTGTCAGCGCAGGGGGCGCCCGTTCTTTTTGTCA  
AGACCGACCTGTCCGGTGCCCTGAATGAACTGCAGGACGAGGCAGCGCGGCTATC  
GTGGCTGGCCACGACGGGGCTTCCTTGCGCAGCTGTGCTCGACGTTGTCACTGAA  
GCGGGAAGGGACTGGCTGCTATTGGGCGAAGTGCCGGGGCAGGATCTCCTGTCA  
CTCACCTTGCTCCTGCCGAGAAAGTATCCATCATGGCTGATGCAATGCGGCGGCTG  
CATACGCTTGATCCGGCTACCTGCCATTTCGACCACCAAGCGAAACATCGCATCGA  
GCGAGCACGTACTCGGATGGAAGCCGGTCTTGTCGATCAGGATGATCTGGACGAA  
GAGCATCAGGGGCTCGCGCCAGCCGAAGTTCGCCAGGCTCAAGGCGCGCATGC  
CCGACGGCGAGGATCTCGTCGTGACCCATGGCGATGCCTGCTTGCCGAATATCATG  
GTGGAAAATGGCCGCTTTTCTGGATTCATCGACTGTGGCCGGCTGGGTGTGGCGG  
ACCGCTATCAGGACATAGCGTTGGCTACCCGTGATATTGCTGAAGAGCTTGGCGGC  
GAATGGGCTGACCGCTTCCTCGTGCTTTACGGTATCGCCGCTCCCGATTTCGACGG  
CATCGCCTTCTATCGCCTTCTTGACGAGTTCTTCTGAGGGGATCGGCAATAAAAAG  
ACAGAATAAAACGCACGGGTGTTGGGTCGTTTGTTCGGATCTAGACTAGATCATAA  
TCAGCCATAACCACATTTGTAGAGGTTTTACTTGCTTTAAAAAACCTCCACACCTCC  
CCCTGAACCTGAAACATAAAATGAATGCAATTGTTGTTGTTAACTTGTTTATTGCAG  
CTTATAATGGTTACAAATAAAGCAATAGCATCACAAATTCACAAATAAAGCATTTT  
TTTCACTGCATTCTAGTTGTGGTTTGTCCAAACTCATCAATGTATCTTATCATGTCTG  
GATCCATAACTTCGTATAGGATACTTTATACGAAGTTATTGGTACCAAACCACAAC  
TAGAATGCAGTGAAAAAATGCTTTATTTGTGAAATTTGTGATGCTATTGCTTTATT



TGTAACCATTATAAGCTGCAATAAACAAGTTAACAACAACAATTGCATTCATTTTAT

GTTTCAGGTTTCAGGGGGAGGTGTGGGAGGTTTTTTAAAGCAAGTAAACCTCTAC

AAATGTGGTATGGCTGATTATGATCTAGAGTCGCGGCCGCCTACTTGTACAGCTCGT

CCATGCCGTACAGGAACAGGTGGTGGCGGCCCTCGGAGCGCTCGTACTGTTCCAC

GATGGTGTAGTCCTCGTTGTGGGAGGTGATGTCCAGCTTGGTGTCCACGTAGTAGT

AGCCGGGCAGTTGCACGGGCTTCTTGGCCATGTAGATGGTCTTGAACTCCACCAG

GTAGTGGCCGCCGTCCTTCAGCTTCAGGGCCTGGTGGATCTCGCCCTTCAGCACGC

CGTCGCGGGGTACAGGCGCTCGGTGGAGGCCTCCCAGCCCATGGTCTTCTTCTG

CATTACGGGGCCGTCGGGGGGGAAGTTGGTGCCGCGCATCTTCACCTTGTAGATCA

GCGTGCCGTCCTGCAGGGAGGAGTCCTGGGTACGGTACCAGACCGCCGTCCTC

GAAGTTCATCACGCGCTCCACTTGAAGCCCTCGGGGAAGGACAGCTTCTTGTA

TCGGGATGTCGGCGGGGTGCTTACGTACGCCTTGGAGCCGTACATGAACTGGG

GGGACAGGATGTCCCAGGCGAAGGGCAGGGGGCCGCCCTTGGTACCTTCAGCTT

GGCGGTCTGGGTGCCCTCGTAGGGGCGGCCCTCGCCCTCGCCCTCGATCTCGAAC

TCGTGGCCGTTTCATGGAGCCCTCCATGCGCACCTTGAAGCGCATGAACTCTTTGAT

GACGGCCATGTTGTTGTCTCGGAGGAGGCGGTGCCGGAGCTGCCGCTGCCGGTG

CTGCCGGTGCCATGCCCCAGGAACAGGTGGTGGCGGCCCTCGGAGCGCTCGTACT

GTTCCACGATGGTGTAGTCCTCGTTGTGGGAGGTGATGTCCAGCTTGGTGTCCACG

TAGTAGTAGCCGGGCAGTTGCACGGGCTTCTTGGCCATGTAGATGGTCTTGAACTC

CACCAGGTAGTGGCCGCCGTCCTTCAGCTTCAGGGCCTGGTGGATCTCGCCCTTCA

GCACGCCGTCGCGGGGGTACAGGCGCTCGGTGGAGGCCTCCCAGCCCATGGTCTT

CTTCTGCATTACGGGGCCGTCGGGGGGGAAGTTGGTGCCGCGCATCTTCACCTTGT

AGATCAGCGTGCCGTCTGCAGGGAGGAGTCCTGGGTACGGTACCAGACCGCC  
GTCCTCGAAGTTCATCACGCGCTCCCACTTGAAGCCCTCGGGGAAGGACAGCTTC  
TTGTAATCGGGGATGTCGGCGGGGTGCTTACGTACGCCTTGGAGCCGTACATGAA  
CTGGGGGGACAGGATGTCCAGGCGAAGGGCAGGGGGCCGCCCTTGGTACCTT  
CAGCTTGGCGGTCTGGGTGCCCTCGTAGGGGCGGCCCTCGCCCTCGCCCTCGATCT  
CGAACTCGTGGCCGTTTCATGGAGCCCTCCATGCGCACCTTGAAGCGCATGAACTCT  
TTGATGACCTCCTCGCCCTTGCTCACCATGGTGGCGACCGGTGGGGCCCGAGGGC  
CGGGATTCTCCTCCACGTCACCGCATGTTAGAAGACTTCTCTGCCCTCGGATCCT  
TTCTTTTTCTTAGCTTGACCAGCTTTCTTAGTAGCAGCAGGACGCTTGTCGCCTCCC  
AGCTGAGACAGGTCGATCCGTGTCTCGTACAGGCCGGTGATGCTCTGGTGGATCA  
GGGTGGCGTCCAGCACCTCTTTGGTGCTGGTGTACCTCTTCCGGTCGATGGTGGTG  
TCAAAGTACTTGAAGGCGGCAGGGGCTCCAGATTGGTCAGGGTAAACAGGTGG  
ATGATATTCTCGGCCTGCTCTCTGATGGGCTTATCCCGGTGCTTGTTGTAGGCGGAC  
AGCACTTTGTCCAGATTAGCGTCGGCCAGGATCACTCTCTTGGAGAACTCGCTGAT  
CTGCTCGATGATCTCGTCCAGGTAGTGCTTGTGCTGTTCCACAAACAGCTGTTTCT  
GCTCATTATCCTCGGGGAGCCCTTCAGCTTCTCATAGTGGCTGGCCAGGTACAGG  
AAGTTCACATATTTGGAGGGCAGGGCCAGTTCGTTTCCCTTCTGCAGTTCGCCGGC  
AGAGGCCAGCATTCTCTTCCGGCCGTTTTCCAGCTCGAACAGGGAGTACTTAGGC  
AGCTTGATGATCAGGTCCTTTTTCACTTCTTTGTAGCCCTTGGCTTCCAGAAAGTCG  
ATGGGATTCTTCTCGAAGCTGCTTCTTTCCATGATGGTGATCCCCAGCAGCTCTTTC  
ACACTCTTCACTTTCTTGGACTTGCCCTTTTCCACTTTGGCCACCACCAGCACAGA  
ATAGGCCACGGTGGGGCTGTCTGAAGCCGCGTACTTCTTAGGGTCCCAGTCCTTCT

TTCTGGCGATCAGCTTATCGCTGTTCCCTCTTGGGCAGGATAGACTCTTTGCTGAAG  
CCGCCTGTCTGCACCTCGGTCTTTTTACGATATCACTTGGGGCATGCTCAGCACT  
TTCCGCACGGTGGCAAATCCCGGCCCTTATCCACACGATCTCCCCGGTTTCGCC  
GTTTGTCTCGATCAGAGGCCGCTTCCGGATCTCGCCGTTGGCCAGGGTAATCTCGG  
TCTTGAAAAAGTTCATGATGTTGCTGTAGAAGAAGTACTTGGCGGTAGCCTTGCCG  
ATTTCCTGCTCGCTCTTGGCGATCATCTTCCGCACGTCGTACACCTTGTAGTCGCCG  
TACACGAACTCGCTTCCAGCTTAGGGTACTTTTTGATCAGGGCGGTTCCCACGAC  
GGCGTTCAGGTAGGCGTCGTGGGCGTGGTGGTAGTTGTTGATCTCGCGCACTTTGT  
AAAAC TGAAATCCTTCCGAAATCGGACACCAGCTTGGACTTCAGGGTGATCAC  
TTCACTTCCCGGATCAGCTTGTCATTCTCGTCGTA CTTAGTGTTTCATCCGGGAGTC  
CAGGATCTGTGCCACGTGCTTTGTGATCTGCCGGGTTCCACCAGCTGTCTCTTGA  
TGAAGCCGGCCTTATCCAGTTCGCTCAGGCCGCCTCTCTCGGCCTTGGTCAGATTG  
TCGAACTTTCTCTGGGTAATCAGCTTGGCGTTCAGCAGCTGCCGCCAGTAGTTCTT  
CATCTTCTCACGACCTTTCGGAGGGCACGTTGTCGCTCTTGCCCCGGTTCTTGT  
CGTTCTGGTCAGCACCTTGTTGTCGATGGAGTCGTCCTTCAGAAAGCTCTGAGGC  
ACGATATGGTCCACATCGTAGTCGGACAGCCGGTTGATGTCCAGTTCCTGGTCCAC  
GTACATATCCCGCCATTCTGCAGGTAGTACAGGTACAGCTTCTCGTTCTGCAGCTG  
GGTGT TTTCCACGGGGTGTCTTTTCAGGATCTGGCTGCCAGCTCTTTGATGCCCT  
CTTCGATCCGCTTCACTCTCTCGCGGCTGTTCTTCTGTCCCTTCTGGGTGGTCTGGT  
TCTCTCTGGCCATTTTCGATCACGATGTTCTCGGGCTTGTGCCGGCCATCACTTTCA  
CGAGCTCGTCCACCACCTTCACTGTCTGCAGGATGCCCTTCTTAATGGCGGGGCTG  
CCGGCCAGATTGGCAATGTGCTCGTGCAGGCTATCGCCCTGGCCGGACACCTGGG

CTTCTGGATGTCCTCTTTAAAGGTCAGGCTGTCGTCGTGGATCAGCTGCATGAAG  
TTTCTGTTGGCGAAGCCGTCGGACTTCAGGAAATCCAGGATTGTCTTGCCGGACTG  
CTTGTCCCGGATGCCGTTGATCAGCTTCCGGCTCAGCCTGCCCCAGCCGGTGTATC  
TCCGCCGCTTCAGCTGCTTCATCACTTTGTCGTCGAACAGGTGGGCATAGGTTTTC  
AGCCGTTCCCTCGATCATCTCTCTGTCCTCAAACAGTGTCAGGGTCAGCACGATATC  
TTCCAGAATGTCCTCGTTTTCTCATTGTCCAGGAAGTCCTTGTCTTGATAATTTT  
CAGCAGATCGTGGTATGTGCCAGGGAGGCGTTGAACCGATCTTCCACGCCGGAG  
ATTTCCACGGAGTCGAAGCACTCGATTTTCTTGAAGTAGTCCTCTTTCAGCTGCTT  
CACGGTCACTTTCCGGTTGGTCTTGAACAGCAGGTCCACGATGGCCTTTTTCTGCT  
CGCCGCTCAGGAAGGCGGGCTTTCTCATTCCCTCGGTCACGTATTTCACTTTGGTC  
AGCTCGTTATACACGGTGAAGTACTCGTACAGCAGGCTGTGCTTGGGCAGCACCTT  
CTCGTTGGGCAGGTTCTTATCGAAGTTGGTCATCCGCTCGATGAAGCTCTGGGCGG  
AAGCGCCCTTGTCCACCACTTCCTCGAAGTTCCAGGGGGTGATGGTTTCTCGCTC  
TTTCTGGTCATCCAGGCGAATCTGCTGTTTCCCCTGGCCAGAGGGCCCACGTAGTA  
GGGGATGCGGAAGGTCAGGATCTTCTCGATCTTTTCCCAGTTGTCCTTCAGGAATG  
GGTAAAAATCTTCTGCCGCCGAGAATGGCGTGCAGCTCTCCAGGTGGATCTG  
GTGGGGGATGCTGCCGTTGTCGAAGGTCCGCTGCTTCCGCAGCAGGTCCTCTCTG  
TTCAGCTTCACGAGCAGTTCTCGGTGCCGTCCATCTTTTCCAGGATGGGCTTGAT  
GAACTTGTAGAACTCTTCTGGCTGGCTCCGCCGTCAATGTAGCCGGCGTAGCCGT  
TCTTGCTCTGGTCGAAGAAAATCTCTTTGTAATTCTCAGGCAGCTGCTGCCGCACG  
AGAGCTTTCAGCAGGGTCAGGTCCTGGTGGTGCTCGTCGTATCTCTTGATCATAGA  
GGCGCTCAGGGGGGCCTTGGTGATCTCGGTGTTCACTCTCAGGATGTCGCTCAGC

AGGATGGCGTCGGACAGGTTCTTGGCGGCCAGAAACAGGTCGGCGTACTGGTTCGC  
CGATCTGGGCCAGCAGGTTGTCCAGGTCGTCGTCGTAGGTGTCCTTGCTCAGCTGC  
AGTTTGGCATCCTCGGCCAGGTCGAAGTTGCTCTTGAAGTTGGGGGTCAGGCCCA  
GGCTCAGGGCAATCAGGTTGCCGAACAGGCCATTCTTCTTCTCGCCGGGCAGCTG  
GGCGATCAGATTTTCCAGCCGTCTGCTCTTGCTCAGTCTGGCAGACAGGATGGCCT  
TGGCGTCCACGCCGCTGGCGTTGATGGGGTTTTCTCGAACAGCTGGTTGTAGGTC  
TGCACCAGCTGGATGAACAGCTTGTCCACGTCGCTGTTGTCCGGGGTTCAGGTCGC  
CCTCGATCAGGAAGTGGCCCCGGAACCTTGATCATGTGGGCCAGGGCCAGATAGAT  
CAGCCGCAGGTCGGCCTTGTCGGTGCTGTCCACCAGTTTCTTTCTCAGGTGGTAGA  
TGGTGGGGTACTTCTCGTGGTAGGCCACCTCGTCCACGATGTTGCCGAAGATGGG  
GTGCCGCTCGTGCTTCTTATCCTCTTCCACCAGGAAGGACTCTTCCAGTCTGTGGA  
AGAAGCTGTCGTCCACCTTGGCCATCTCGTTGCTGAAGATCTCTTGCAGATAGCAG  
ATCCGGTTCTTCCGTCTGGTGTATCTTCTTCTGGCGGTTCTCTTCAGCCGGGTGGCC  
TCGGCTGTTTCGCCGCTGTCGAACAGCAGGGCTCCGATCAGGTTCTTCTTGATGCT  
GTGCCGGTTCGGTGTGGCCAGCACCTTGAATTTCTTGCTGGGCACCTTGTACTCGT  
CGGTGATCACGGCCCAGCCCACAGAGTTGGTGCCGATGTCCAGGCCGATGCTGTA  
CTTCTTGTCCGGCTGCTGGGACTCCGTGGATACCGACCTTCCGCTTCTTCTTGGGG  
CCATCTTATCGTCATCGTCTTTGTAATCAATATCATGATCCTTGTAGTCTCCGTCGTG  
GTCCTTATAGTCCATAAGCTTGTGACCTCCTCGCCCTTGCTCACCATGGTGGCGG  
ATCTATAACTTCGTATAATGTATGCTATACGAAGTTATCCTGCATCGACCTAGACTAG  
CTAGAACTAGTATAACTTCGTATAAAAGTATCCTATACGAAGTTATCCTGCAGGGGGAT  
TGAGCAGGTGTACGAGGACGAGCCCAATTTCTCTATATTCCACAGTCTTGAGTTT

GTGTCACAAAATAATTATAGTGGGGTGGAGATGGGAAATGAGTCCAGGCAACACC  
TAAGCCTGATTTTATGCATTGAGACTGCGTGTTACTACTAAAGATCTTTGTGTGCGCA  
ATTCCTGATGAAGGGAGATAGGTAAAAAGCACGGATCTACTGAGTTTTACAGTC  
ATCCCATTTGTAGACTTTTGCTACACCACCAAAGTATAGCATCTGAGATTAATATT  
AATCTCAAACCTTAGGCCCTCACTTGCATCCTTACGGTCAGATAACTCTCACTC  
ATACTTTAAGCCCATTTGTGTTGTACTTGCTCATCCAGTCCCAGACATAGCATT  
GGCTTTCTCCTCACCTGTTTTAGGTAGCCAGCAAGTCATGAAATCAGATAAGTTCC  
ACCACCAATTAACACTACCCATCTTGAGCATAGGCCCAACAGTGCATTTATTCCTCA  
TTACTGATGTTTCGTGAATATTTACCTTGATTTTCATTTTTTCTTTTTCTTAAGCTGG  
GATTTTACTCCTGACCCTATTCACAGTCAGATGATCTTGACTACCACTGCGATTGGA  
CCTGAGGTTCAAGCAATACTCCCCTTATGTCTTTGAATACTTTCAATAAATCTGT  
TGTATTTTCATTAGTTAGTAACTGAGCTCAGTTGCCGTAATGCTAATAGCTTCCAAA  
CTAGTGTCTCTGTCTCCAGTATCTGATAAATCTTAGGTGTTGCTGGGACAGTTGTCC  
TAAAATTAAGATAAAGCATGAAAATAACTGACACAACCTCCATTACTGGCTCCTAAC  
TACTTAAACAATGCATTCTATCTTCACAAATGTGAAAAAGGAGTTCCTCAGTGGA  
CTAACCTTATCTTTTCTCAACACCTTTTTCTTTGCACAATTTCCACACATGCCTACA  
AAAAGTACTTTTCTGCTCAAGTCACACTGAGTTGATTGCTATTTACCAAATCAAA  
GTAACATTATCAGATCTCTGTAGGGTGGTTCCTCTGGAATGCTACCCTCCATAGTC  
CTTACCCTTCAAGTAAAGAGCATGAAGACTGAAATATCTCCTCTGTGATCTGTCATC  
CTTTAAGCCAGAATCCCCATAAAAAAGTTAGTATTGCTTTCTCCTGATCCCATAGC  
AGGTTGAATCATAGCACTTATCAGGTTGTTGTCATTGCTTGCTTAAATTCTCCTAAC  
TATTTGGAGCTTCTTGAGGGCACAGGTTCTTGTTGAGTCTTGTACCTAAGCACCTA

GTATAGTCCTTGATGTCTAGCCAACCCTAAATAAAATGCAGTGAGTGACATGTAGAT  
GTCTTTATAAGGTTTGATAGGTTGGTCTCTCAAATAGTTCTTTTGTATGTTGGTAGT  
GCTCTAGATTAGCACTGGCCAGTATAACTCTGATGATGGAAATGTTCTATAGCTATG  
CTGTCTAATATGGTAGTCACTACTAACATATGTTACTGTTGAGCCTTGGAAGTATGG  
CTTTTGTGACAAAAGTGAATTTTTTCATGCTATGTAATTTAAGTCTAAATTGCTACTGT  
GTACATTGTGGCTGTAGCCACAAATTTGTGCTGTGGATTGCAGAATAATTAATATGG  
ACATTGATAATTTCTTTTCATACTAAGCAGTAAGGAAAGAAAAGTTGAAACTCTG  
TGGTCCATTTAGGTTATATGTGTATTTGTAAGTTGATTGGTTTGTGTTGAATACCTATTTG  
TATACTTTAGCTGAGAGCTAAAGCCAACAAACCAGTACTGTAGATAACCTGCTTTG  
GACAACAATGTGTTGACTAGTTGGATTTACCCAAAGAATGCCTAATAAATTTTAAG  
AAAATGAGATTTCAATTAACCATAATACTGACATAAGTTTAGGGAAGAATCAGACT  
ATATCTGGTGTGTTGTGAAACTACCCCTGAATTTAGTCCTACAAAGTTTTCAGTTTT  
GGAAAACTTTCATCAGAGAGGGCACTAAGTTACAGGAAGCCATCACAAAGTAAG  
TTTTCATCTGATGAATTATAAATTTAAGATATATTTTAATACCAAATTTCTTTATGGTT  
TATGTGCTAACTTAAAATTTCTCCTTAAAATATGAGAACTAAGTACACAATTGTACT  
TGGCTGTTTAATGCGGATTCCCAGTCCCTCACACAGAGATTCTCAATTAAGATTGG  
AGAGCAGGGGTTACTAGAATTCTTTTTCAGGTTCCCTTATATGCTTCTGATTGGTGG  
CCTAGAAATCACAAATGCTAGTGCAGCCCTCATGGGGCTACAGTATACGTATCTGAA  
ACATGATTACATCAGGGAAACTGTATGTCTAATCTACTTTGTCCCTAAAGGAAGCAT  
TTTGAAAGGCAGAAAGTAATATGTGATAGTTTTTGTGAAACTTGTAGGTCACATTGTT  
TTAAAAGGGATCCAAGTAAGTTTTTTTTCTTTTGTGAGGGCTACACCTGTGGCACAT  
GGAGGTTCCCAGGCTAGGGGTTAAATCAGAACTGCAGCTGCCAGCCTATGCCAGA

GCCACAGCAATGCCAGATCTGAGCTGTGTCTGCAACTGTGTAGCTCACAGCAACG  
CTGGATCCTTAACCCAATGAGCAAGGCCAGAGATTGAACCTACAACCTCGTGGTTC  
CTAGTTAGATTTGTTTCCGCTGTGCCACGATGGGAACTCCAAGTAATTTTTTTTGA  
GCAAGGAAGTTACCTTTTTGTCTGTTTTCCCACTAAATGCATTCCTCAAGGATTCC  
CAGTTTGTTCCTTGATTCCCTCAGTGCCTTAACACAGACCTGGGTTCTCAGTAAATGTT  
GATTTATTGATTTATAATGTGAAATTGTTTTCAAATAATAGTTTTTAAGTCCATAGA  
ACAATGCTTCTTTATGGAGATACTTTAGGATCATACTTGTAACCCAAGTTGCCTA  
ATACTCTGTTCATAAAGAAAACCTCATGCCTCATGGTCTCTGAATAATACATCTGTCT  
ACCATTGAGCTCTTCCTTGGGTTTCCTGTGCAAACCATTGCACTTATCCTCTTCCTG  
TGCTATACTTCCTCAGGCTTTATTACAGTTTTTAAAATAAACCAACTATCTATCTCTC  
TTGAAGTAGAGCCATAATAATTGCATGAGAACACTGAAGGTTTTTAGGCTTTAATT  
TTTTCTTTTTTTAAGATATTCAAATTTGGAGTTCTTGTTGTGGCGCAGTGGTTA  
ACGAACCCAACCTAGGAACCATGACGCTGCAGGTTCCGGTCCCTGGCCTCGCTCAGT  
GGGTTAAGGATCCAGCGTTGCCATGAGCTGTGGTATAGGTCCATATGTGGCTCGGA  
TCCTGCATTGCTGTGGCTGTGGCAGCAGCCACAGGTACGATTAGACCCCTAGCCTG  
GGACCCTCCATATGCTGTGGGCGCGGTCCTAGAAAAGAAAAAAAAAAAAAGAAAAG  
AAAAGAAAGATATACAAAATTTGAACTACGCATTGTTCTCTTAACAGTTGTTATGT  
ATGGAGGAGGTTTGTTATAATTACAGTTTACAACCTCTTAATCCAGAATATGTTAGGG  
ATCCACATTCCCAGGGTAAGACTAGTTTGTTTTAGGCCAGACTTAATTGTACAGCC  
CATTGTCCAGCCACATACTCAGGAGTCTCATACTTTCAGGCTAAAAATTCTTGATT  
TTGTTACCTAGTAGTGTACTGTTTCATGTTGGGGAACTTTTTCTCCAGAAAAGTTTA  
TTATCCATTATCCTGCCTCCTTTTTATTTTCATTTATTTATTTATTTTGGCTTTTTT



AGGGCCACACTTGTGGCATATGGAAATCCTGGGCTAGGGGTCAAATCAGGGCTTC  
AGCTGCTGGCCTATGCCACAACAACACGGGATCAGAGCTGCTCGCAATCTATGTCC  
TCACGTTNNNNNNNNNNNNNNNNNNNNNNNNNNNNNNNNNNNNNNNNNNNNNNNN  
NNNNNNNNNNNNNNNNNNNNNNNNNNNNNNNNNNNNNNNNNNNNNNNNNNNNNN  
NNNGAAAATGAGAAAGCAAGACTTTTGGGTATCTGGGAGAAGAGCATTCCAGGA  
CCAGGGCAGATTCATGTTCAAGAGGGTTTAGGAGTAGCCAGCTAGGAGGCCAGCT  
TGTCAGGGAGAGAATTAGGGGGAGAGGGAGATGATGAGATGGGGTGGGTACATA  
GTATAGTCCAATGTTTTACACACTATCACCATGAATTGGATGTTAAACTGATTATCA  
GGGAGCTACTAATAGCGTGGAATGCAAATATGTCGGTCAGTTTTCTGTAGGCCAGA  
GTCAAACCTTGAGGACTTATTACTGGTGTCATGGTGTATACCTTTCTTGCTGACTAGA  
GACTATTTCTGCCTCTCTGATTGTATCTCAAAGTCATGGTTGCATTTAATCCTACTTT  
TCCAGCCTTTTCCCCCAGATATTTAGTTTGTACTGGTACTTAGTCACCCTTTGTTTTC  
TAGGTTTGTGGTTTTTTTTTTTTTTTAAACATGTTTGTGATTGGCTTTTCCTGCTGAC  
AACAGTAACACATTTTCTCAGCACATTTATAGAATTCGTTATTTTACTAGCTAACTAA  
CCCCACCCTCTAGTGTAGGGACAGTGGTTTTTTCTTTTTTATTAACCTTTGGTTAAAA  
TCCCACCCAGACTTTTTATTACAAGTAATAGCAATTTACCCTAGTGCATACCATAG  
GCAAAAGCTAATGGAAATGTAGGTTAGAAGAAATGAACTAATATTCGTTGAGTGAC  
AGTTCTGTACCAGTTAGTATGGCAGACTTGCCAGTGAGTTTAGTGTGGTTCTGATG  
TATAAACTTCATCTTACAGAGTGTGAAACTAAAGCTCAGTGAGGTTTAATAATTCT  
CCTGTAAACACAGCAATTAGGAGCTACAGATTCAAATCTAATCTGACTTACCTA  
GTCGGTATCCCTTACTTAGCTTAGGGTACCATGTTTCTCTATAGAAACAGTCTTTTA  
GGAAATTTAATCTGGCTACAGATACAGGATGGGTTGTAGGGTTGAAGGCAGAGAG

ACCAAAGTCTAGGAGATTCTTTTACAGTAGTCCTGACAGGAAGCGATGGGGTCTGTT

ATACAATGATGGCAATCAAATGGAAAGGAAGTTAAAGGACTCTGAACACCAGTC

ACTGAAAAGAATGGTCTCAACACATCACTTTTCAAGGAAGCCTTCCTTGATGCCCT

TAACTCCACGATATTGGATTCCCCACTTGAAAGCTGTCATAGCACTTCTCACAAC

GTATTAGATTAGTAAGTGGGGGAATTTTTTTTTTGCTTTTAAAGGTTGCTCCTTGAG

GGGATGATGGTGTCTTATATTCCTGTTGTCTAATCATAGGGAGGTCTTCAGGTCAAAA

CTATTTTCATAGGAATTCTCTGGTGGCCTATGGGTTAAGGATTGGCATTGTCACTG

CTGTGGGTGTGGCCAGAGCCATTTTTTTTTCTCACAGGTGTGTAGGGGCTATGTG

AATTTCCAGAATTTCCAAGGTTGTAGGTTTATGTTTTGTAACCTTAGAAATTAAC

TTTCTTTAGGTTATACCTCTAAAATCCACCAACCTTCAGAATTATGTAATTGCTACT

ACAAAAGTCTGTAGTTAAATACATTCTGTGGTCTGTATGAAATAAAGTTTTAAAT

ATTTCTCACAACCTTATTAACTTTTAAATTAATTACAACCTGTTTTAGAATTTTCTA

GAAGTCTGGATCCCCATCGAATTCTACCGGGTAGGGGAGGCGCTTTTCCAAGG

CAGTCTGGAGCATGCGCTTTAGCAGCCCCGCTGGGCACTTGGCGCTACACAAGTG

GCCTCTGGCCTCGCACACATTCCACATCCACCGGTAGGCGCCAACCGGCTCCGTTC

TTTGGTGGCCCCTTCGCGCCACCTTCTACTCCTCCCCTAGTCAGGAAGTTCCCCC

CGCCCCGAGCTCGCGTCGTGCAGGACGTGACAAATGGAAGTAGCACGTCTCACT

AGTCTCGTGCAGATGGACAGCACCGCTGAGCAATGGAAGCGGGTAGGCCTTTGGG

GCAGCGGCAATAGCAGCTTTGCTCCTTCGCTTTCTGGGCTCAGAGGCTGGGAAG

GGGTGGGTCCGGGGGCGGGCTCAGGGGCGGGCTCAGGGGCGGGGCGGGCGCCC

GAAGGTCTCCGGAGGCCCGGCATTCTGCACGCTTCAAAGCGCACGTCTGCCGC

GCTGTTCTCCTCTTCTCATCTCCGGGCCTTTCGACCTGCAGGTCCTCGCC**ATGGA**

TCCTGATGATGTTGTTGATTCTTCTAAATCTTTTGTGATGGAAAACCTTTTCTTC  
GTACCACGGGACTAAACCTGGTTATGTAGATTCCATTCAAAAAGGTATACAAA  
AGCCAAAATCTGGTACACAAGGAAATTATGACGATGATTGGAAAGGGTTTTAT  
AGTACCGACAATAAATACGACGCTGCGGGATACTCTGTAGATAATGAAAACCC  
GCTCTCTGGAAAAGCTGGAGGCGTGGTCAAAGTGACGTATCCAGGACTGAC  
GAAGGTTCTCGCACTAAAAGTGGATAATGCCGAACTATTAAGAAAGAGTTAG  
GTTTAAGTCTCACTGAACCGTTGATGGAGCAAGTCGGAACGGAAGAGTTTAT  
CAAAAGGTTTCGGTATGGTGCTTCGCGTGTAGTGCTCAGCCTTCCCTTCGCT  
GAGGGGAGTTCTAGCGTTGAATATATTAATAACTGGGAACAGGCGAAAGCGT  
TAAGCGTAGAACTTGAGATTAATTTTGAAACCCGTGGAAAACGTGGCCAAGA  
TGCGATGTATGAGTATATGGCTCAAGCCTGTGCAGGAAATCGTGTCAAGCGA  
TCTCTTTGTGAAGGAACCTTACTTCTGTGGTGTGACATAATTGGACAAACTAC  
CTACAGAGATTTAAAGCTCTAAAGGTAATATAAAAATTTTAAAGTGTATAATGTGTT  
AAACTACTGATTCTAATTGTTTGTGTATTTTAGATTCCAACCTATGGAACTGATGAAT  
GGGAGCAGTGGTGGAAATGCAGATCCTAGAGCTCGCTGATCAGCCTCGACTGTGCC  
TTCTAGTTGCCAGCCATCTGTTGTTTGCCCTCCCCCGTGCCTTCCTTGACCCTGGA  
AGGTGCCACTCCCCTGTCCTTTCCTAATAAAAATGAGGAAATTGCATCGCATTGTCT  
GAGTAGGTGTCATTCTATTCTGGGGGGTGGGGTGGGGCAGGACAGCAAGGGGGA  
GGATTGGGAAGACAATAGCAGGCATGCTGGGGATGCGGTGGGCTCTATGG
