# Supplementary material for: Cre-dependent Cas9-expressing pigs enable efficient in vivo genome editing
Source: HighWire-hosted journal article supplement (doi:10.1101/gr.222521.117), 2017-11-16
Supplement: Supplemental_Table_S1.xlsx [file Supplemental_Table_S1.xlsx]

## Sheet: Sheet1
Supplemental Table 1. Summary of somatic cell nuclear transfer (SCNT) results for generating Cre-dependent Cas9-expressing pigs.
Cell pools	Transferred embryos	No. recipients	No. (%) pregnancies	No. cloned piglets	No. (%) Knockin
1#，3#，4#，5#，8#，9#，10#，11#，12#，13#	986	4 (A202, A203, A204, A205)	1 (A202)	2 (A202-1#, A202-2#)	1 (A202-1#)
15#，16#，17#，18#，19#，21#，22#，23#，24#	1228	6 (A229, A230, A231, A232, A248, A249)	2 (A229, A249)	3 (A229-1#, A229-2#, A249-1#)	2 (A229-1#, A249-1#)
Total	2214	10	3(30%)	5	3（60%）
