# Supplementary material for: Cre-dependent Cas9-expressing pigs enable efficient in vivo genome editing
Source: HighWire-hosted journal article supplement (doi:10.1101/gr.222521.117), 2017-11-16
Supplement: Supplemental_Table_S2.xlsx [file Supplemental_Table_S2.xlsx]

## Sheet: Sheet1
Supplemental Table 2. On- and off-target sites for the pRosa26 TALENs predicted by TALENoffer.
	Chr #	Position 1	Position 2	Distance	Architecture	Full site	Score by TALENoffer	5' primer for sequencing (5'-3')	3' primer for sequencing (5'-3')
On-Target	chr13	65758557	65758591	15	Left-Right	TGGCTTAACCTGATTCTtgggcgttgtcctgcAGGGGATTGAGCAGGTGTA	-0.421255
Off-Target 1	chr2	103870584	103870621	20	Left-Right	TACCTTCACCTAGTTATtcagatagaatactcctatgAGGGGATTTTGCAGGTGTA	-1.37546	gcgtgggtctatccctggcc	cctcatctggacctcagagtc
Off-Target 2	chr12	23971293	23971329	17	Right-Right	CCCACCTCCTCACACCCCTcccctccccctcagtgcAGGGGAGTGGGGGGGTGTG	-1.44481	gagcctgccgcccccacaatg	cacaagtcacctgtggctacta
Off-Target 3	chr15	99211783	99211812	12	Left-Left	TGGCTTAAGCTCATTTTatcactgacaaaAGAAAAAAGTTAAGCCA	-1.49697	ccaaacattaccccacaaatatt	gggtacaaccttggggaagcta
Off-Target 4	chrX	17760674	17760704	13	Left-Left	CTGCTAAATCTGTTCCTtaacatctctgcaAGTATCAGGTTAAGCCA	-1.56579	gtttgagtctcttggcccagat	cttggccatctgaatctcagaa
Off-Target 5	chr1	3226635	3226665	11	Right-Right	AACAACTGCTCTTTACCCTttggtcagggaAGGAGATTGAGTAGTTATA	-1.59104	ctgagcatttactctgtgctgg	gacctaagctgtgggtcctga
Off-Target 6	chrX	123429916	123429943	10	Left-Left	TGGGTAAACATGATTCTccttaatgaaAGAAACATTTTAAGCAA	-1.60839	gcctgcctgattaatgcggtt	gtagggtgacatccagctctc
Off-Target 7	chr16	61108565	61108601	19	Left-Right	TGGCAACACCAGATTCTttaacctactatgttgggcTGGGGATTGAACCTGTGTA	-1.60848	ggagtatgggaatctttacctc	gttcctctaggacttactgtg
Off-Target 8	chr16	72382782	72382813	14	Left-Left	AACTTAACCAGATTATtagctatttatgatAGAAACAGATTGGGGCA	-1.60951	ggctttcttggctatggaagga	gtctgcctgggacagaggagg
We did not see any insertions or deletions at predicted off-target sites in the pRosa26-iCas9 pig line.
