# Supplementary material for: Cre-dependent Cas9-expressing pigs enable efficient in vivo genome editing
Source: HighWire-hosted journal article supplement (doi:10.1101/gr.222521.117), 2017-11-16
Supplement: Supplemental_Table_S3.xlsx [file Supplemental_Table_S3.xlsx]

## Sheet: Sheet1
	Supplemental Table 3. Primers used in this study.
	Site ID	PCR Primers（5′-3′）
	F1	TGCGTGAGTCTCTGAGCGCAG
	R1	GGCATCAGAGCAGCCGATTGT
	F2	GATGCTGTGCCGGTCGGTGTT
	R2	GGTCAAACAGTGGCTCACATCT
	F	CTCGTCATCGCCTCCATGTCAG
	R	GTTGGGCCTATGCTCAAGATGG
	GGTA1-gRNA-F	CACCGAGAAAATAATGAATGTCAA
	GGTA1-gRNA-R	AAACTTGACATTCATTATTTTCTC
	TP53-gRNA-F	CACCGCAGCTATGATTTCCGTCTA
	TP53-gRNA-R	AAACTAGACGGAAATCATAGCTGC
	PTEN-gRNA-F	CACCGCAGCAATTCACTGTAAAGC
	PTEN-gRNA-R	AAACGCTTTACAGTGAATTGCTGC
	KRAS-gRNA-F	CACCGTAGTTGGAGCTGGTGGCGT
	KRAS-gRNA-R	AAACACGCCACCAGCTCCAACTAC
	APC-gRNA-F	CACCGGCAACTTCGGGTAACGGTC
	APC-gRNA-R	AAACGACCGTTACCCGAAGTTGCC
	BRCA1-gRNA-F	CACCGGAAGAAATGGATTTATCTG
	BRCA1-gRNA-R	AAACCAGATAAATCCATTTCTTCC
	BRCA2-gRNA-F	CACCGGCACAGAAGGTTTATGTGC
	BRCA2-gRNA-R	AAACGCACATAAACCTTCTGTGCC
	EML4-gRNA-F	CACCGTGAAGTGCCAGAGCATACA
	EML4-gRNA-R	AAACTGTATGCTCTGGCACTTCAC
	ALK-gRNA-F	CACCGGATTAGAACACAAGTCCTC
	ALK-gRNA-R	AAACGAGGACTTGTGTTCTAATCC
	GGTA1-F	ATCCTTCCCAACCCAGACGG
	GGTA1-R	ACAGCAATGCCAGATCCGAGC
	TP53-F	TCCATCCGCAGTCCTCTGAGCT
	TP53-R	GATGAGAGGCCAAGGTCAAGTG
	PTEN-F	TGGCCTCCCTATCTAATGGGGA
	PTEN-R	AGAAACAAGGGTTACCAACTAGC
	KRAS-F	GCACATCTGTGGTCAACGGGC
	KRAS-R	CTCCCCAGAGAAGACTGAAGAC
	APC-F	GCTCCATTAAATGCCAGAGCCA
	APC-R	CCGATTGTTCTGGAGATACCCA
	BRCA1-F	GCTGTTTTACAGTGTTCTGTCA
	BRCA1-R	AGAGCTACAGCTTCTGCGAC
	BRCA2-F	GCAGATCCTTGAATGTACAGGTC
	BRCA2-R	GGGATTGAACTCGAAACCTCA
	A	GCCCCCTCCCCATGAATCAT
	B	TAGGGGCCAAAGTCAGCCATC
	C	GCCTTACTCCTGCTCAAGCA
	D	CCAACACCACACAGTTAGCTAG
	EML4-F	TGGGGAATGGAGATGTGCTT
	ALK-R	TGAGGGTGATGTTTTTCCGAG
